# Supplementary material
Source: MDPI journal article supplement (https://www.mdpi.com/2075-163X/11/11/1288)
Supplement: s1 [file s1]

## Supplementary Material

### **Albite-actinolite altered porphyry dykes in Archean gold deposits of the Boulder Lefroy-Golden Mile fault system, Yilgarn Craton, Western Australia: Petrography, chronology, and comparison to Canadian albitites**

Andreas G. Mueller

*Centre for Exploration Targeting, School of Earth Sciences, The University of Western Australia, 35 Stirling Highway, Perth W.A. 6000, Australia*

*Corresponding author: [andreasm@iinet.net.au](mailto:andreasm@iinet.net.au)*

Neal J. McNaughton

*John de Laeter Centre for Isotope Research, Curtin University, Kent Street, Bentley W.A. 6102, Australia*

Janet R. Muhling

*School of Earth Sciences, The University of Western Australia, 35 Stirling Highway, Perth W.A. 6000, Australia*

Minerals, MDPI, Article ID minerals-1435424, November 2021

#### **Contents**

**Table S1a:** Whole rock major element analyses and Mesonorms after Barth (1959) of porphyry dykes from the Hampton-Boulder open pit and outcrops at the New Celebration gold deposit, Kalgoorlie, Western Australia.

**Table S1b:** Whole rock trace element analyses of porphyry dykes from the Hampton Boulder open pit and outcrops at the New Celebration gold deposit, Kalgoorlie, Western Australia.

**Table S2:** Energy dispersive (EDS) electron microprobe analyses of actinolite and albite in dykes from the Hampton Boulder open pit, New Celebration gold deposit, Kalgoorlie, Western Australia.

**Figure S1:** Scanning electron microscope backscattered electron and cathodo-luminescence images of SHRIMP mount 12-21C showing igneous zircons with oscillatory zones and alteration titanite (Ttn) from porphyry HB-8a.

**Table S3:** SHRIMP ion microprobe U-Pb analyses of zircons from the Albite-actinolite Porphyry dyke (sample HB-8a), Hampton-Boulder open pit, New Celebration gold deposit, Kalgoorlie, Western Australia.

#### **References**

Details of analytical methods and explanatory comments are given in the footnotes of the data tables.

|                   |                                                                                                                                                                                      |
|-------------------|--------------------------------------------------------------------------------------------------------------------------------------------------------------------------------------|
| <b>Table S1a:</b> | Whole rock major element analyses and Mesonorms after Barth (1959) of porphyry dykes from the Hampton Boulder open pit and outcrops at the New Celebration gold deposit, Kalgoorlie. |
|-------------------|--------------------------------------------------------------------------------------------------------------------------------------------------------------------------------------|

|                                                                                                                                                                                                                                                                                                                                                                                                                                                                                                                                                                                                                                                                    | Quartz-plagioclase porphyries |             |                 |               | Albite-act Porphyries |            | Reference data     |          |
|--------------------------------------------------------------------------------------------------------------------------------------------------------------------------------------------------------------------------------------------------------------------------------------------------------------------------------------------------------------------------------------------------------------------------------------------------------------------------------------------------------------------------------------------------------------------------------------------------------------------------------------------------------------------|-------------------------------|-------------|-----------------|---------------|-----------------------|------------|--------------------|----------|
| Sample no.                                                                                                                                                                                                                                                                                                                                                                                                                                                                                                                                                                                                                                                         | 59070                         | HB-4        | HB-5            | HB-6          | HB-8a                 | 59071      | TTG                | Archean  |
| Location                                                                                                                                                                                                                                                                                                                                                                                                                                                                                                                                                                                                                                                           | Surface                       | HB open pit | HB open pit     | HB open pit   | HB open pit           | Surface    | batho-             | adakites |
| MGA North (m)                                                                                                                                                                                                                                                                                                                                                                                                                                                                                                                                                                                                                                                      | 656 5985                      | 656 6161    | 656 6317        | 656 6307      | 656 6122              | 656 6015   | liths              | (sanuki- |
| MGA East (m)                                                                                                                                                                                                                                                                                                                                                                                                                                                                                                                                                                                                                                                       | 367 250                       | 366 890     | 366 723         | 366 695       | 366 843               | 366 935    | <3 Ga              | toids)   |
| Elevation a.s.l.                                                                                                                                                                                                                                                                                                                                                                                                                                                                                                                                                                                                                                                   | 355                           | 267         | 224             | 224           | 224                   | 355        | n = 666            | <62%     |
| Dyke name                                                                                                                                                                                                                                                                                                                                                                                                                                                                                                                                                                                                                                                          | Southeast                     | East        | Main            | Main          | Albite-act            | Albite-act |                    | SiO2     |
| Phenocrysts (%)                                                                                                                                                                                                                                                                                                                                                                                                                                                                                                                                                                                                                                                    | 30pl, 3qtz                    | 35pl, 3qtz  | 25pl, 2qtz      | 5pl, 2qtz     | 20pl                  | 20pl, 1qtz |                    | n = 31   |
| Alteration                                                                                                                                                                                                                                                                                                                                                                                                                                                                                                                                                                                                                                                         | 2act, 2ms,                    | 5bt, 3cal   | 5bt, 3ms, 7ank, | 5-10ms, 2kfs, | 20act, 4cal,          | 10act,     |                    |          |
| minerals (vol. %)                                                                                                                                                                                                                                                                                                                                                                                                                                                                                                                                                                                                                                                  | 1py(ox)                       | 1mag+py     | 3kfs, 1mag, 1py | 15ank, 5py    | 3py, 1ilm             | 1py(ox)    | Martin et al. 2005 |          |
| SiO <sub>2</sub> (wt. %)                                                                                                                                                                                                                                                                                                                                                                                                                                                                                                                                                                                                                                           | 74.52                         | 70.83       | 69.46           | 56.20         | 61.69                 | 66.07      | 68.36              | 58.76    |
| TiO <sub>2</sub>                                                                                                                                                                                                                                                                                                                                                                                                                                                                                                                                                                                                                                                   | 0.24                          | 0.17        | 0.17            | 0.26          | 0.48                  | 0.60       | 0.38               | 0.74     |
| Al <sub>2</sub> O <sub>3</sub>                                                                                                                                                                                                                                                                                                                                                                                                                                                                                                                                                                                                                                     | 15.60                         | 15.00       | 14.65           | 14.43         | 15.17                 | 17.38      | 15.52              | 15.80    |
| Fe <sub>2</sub> O <sub>3</sub>                                                                                                                                                                                                                                                                                                                                                                                                                                                                                                                                                                                                                                     | 0.07                          | n.a.        | n.a.            | n.a.          | n.a.                  | 1.93       | n.a.               | n.a.     |
| FeO                                                                                                                                                                                                                                                                                                                                                                                                                                                                                                                                                                                                                                                                | 0.87                          | 1.00        | 0.98            | 2.96          | 3.45                  | 1.61       | 2.94               | 5.28     |
| MnO                                                                                                                                                                                                                                                                                                                                                                                                                                                                                                                                                                                                                                                                | < 0.01                        | 0.01        | 0.01            | 0.04          | 0.05                  | 0.04       | 0.05               | 0.09     |
| MgO                                                                                                                                                                                                                                                                                                                                                                                                                                                                                                                                                                                                                                                                | 0.99                          | 0.75        | 0.75            | 2.76          | 3.13                  | 3.51       | 1.36               | 3.90     |
| CaO                                                                                                                                                                                                                                                                                                                                                                                                                                                                                                                                                                                                                                                                | 0.81                          | 1.39        | 1.49            | 4.99          | 3.90                  | 2.24       | 3.23               | 5.57     |
| Na <sub>2</sub> O                                                                                                                                                                                                                                                                                                                                                                                                                                                                                                                                                                                                                                                  | 6.59                          | 7.98        | 6.16            | 6.52          | 8.92                  | 6.89       | 4.70               | 4.42     |
| K <sub>2</sub> O                                                                                                                                                                                                                                                                                                                                                                                                                                                                                                                                                                                                                                                   | 0.14                          | 0.56        | 3.22            | 2.38          | 0.08                  | 0.11       | 2.00               | 2.78     |
| P <sub>2</sub> O <sub>5</sub>                                                                                                                                                                                                                                                                                                                                                                                                                                                                                                                                                                                                                                      | 0.08                          | 0.07        | 0.08            | 0.10          | 0.28                  | 0.36       | 0.15               | 0.39     |
| L.O.I.                                                                                                                                                                                                                                                                                                                                                                                                                                                                                                                                                                                                                                                             | 0.23                          | 2.04        | 2.87            | 9.59          | 2.99                  | 0.53       | 1.09               | 1.79     |
| Total                                                                                                                                                                                                                                                                                                                                                                                                                                                                                                                                                                                                                                                              | 100.14                        | 99.80       | 99.84           | 100.23        | 100.14                | 101.27     | 99.78              | 99.52    |
| CO <sub>2</sub>                                                                                                                                                                                                                                                                                                                                                                                                                                                                                                                                                                                                                                                    | 0.08                          | 1.61        | 2.09            | 7.59          | 1.43                  | 0.06       |                    |          |
| Sulfur                                                                                                                                                                                                                                                                                                                                                                                                                                                                                                                                                                                                                                                             | 0.06                          | 0.14        | 0.28            | 1.50          | 1.06                  | 0.01       |                    |          |
| Mg/(Mg+Fe total)                                                                                                                                                                                                                                                                                                                                                                                                                                                                                                                                                                                                                                                   | 0.65                          | 0.57        | 0.58            | 0.62          | 0.62                  | 0.65       | 0.45               | 0.57     |
| Mesonorm (equivalent cation percent)                                                                                                                                                                                                                                                                                                                                                                                                                                                                                                                                                                                                                               |                               |             |                 |               |                       |            |                    |          |
| calcite                                                                                                                                                                                                                                                                                                                                                                                                                                                                                                                                                                                                                                                            | 0.20                          | 3.98        | 5.20            | 18.14         | 3.44                  | 0.16       | 0.00               | 0.00     |
| apatite                                                                                                                                                                                                                                                                                                                                                                                                                                                                                                                                                                                                                                                            | 0.16                          | 0.00        | 0.00            | 0.00          | 0.56                  | 0.75       | 0.32               | 0.83     |
| pyrite                                                                                                                                                                                                                                                                                                                                                                                                                                                                                                                                                                                                                                                             | 0.15                          | 0.36        | 0.72            | 3.68          | 2.63                  | 0.02       | 0.00               | 0.00     |
| magnetite                                                                                                                                                                                                                                                                                                                                                                                                                                                                                                                                                                                                                                                          | 0.08                          | 0.00        | 0.00            | 0.00          | 0.00                  | 1.97       | 0.00               | 0.00     |
| titanite                                                                                                                                                                                                                                                                                                                                                                                                                                                                                                                                                                                                                                                           | 0.48                          | 0.00        | 0.00            | 0.00          | 0.96                  | 1.20       | 0.81               | 1.56     |
| orthoclase                                                                                                                                                                                                                                                                                                                                                                                                                                                                                                                                                                                                                                                         | 0.00                          | 0.50        | 16.13           | 5.63          | 0.00                  | 0.00       | 4.88               | 10.49    |
| albite                                                                                                                                                                                                                                                                                                                                                                                                                                                                                                                                                                                                                                                             | 58.35                         | 69.80       | 54.35           | 55.30         | 76.35                 | 59.95      | 42.70              | 40.15    |
| anorthite                                                                                                                                                                                                                                                                                                                                                                                                                                                                                                                                                                                                                                                          | 2.15                          | 0.00        | 0.00            | 0.00          | 0.00                  | 6.02       | 13.85              | 7.78     |
| corundum                                                                                                                                                                                                                                                                                                                                                                                                                                                                                                                                                                                                                                                           | 4.11                          | 1.34        | 1.10            | 1.17          | 0.00                  | 3.87       | 0.67               | 0.00     |
| hornblende                                                                                                                                                                                                                                                                                                                                                                                                                                                                                                                                                                                                                                                         | 0.00                          | 0.00        | 0.00            | 0.00          | 16.28                 | 0.00       | 0.00               | 22.48    |
| biotite                                                                                                                                                                                                                                                                                                                                                                                                                                                                                                                                                                                                                                                            | 5.16                          | 4.40        | 4.11            | 12.20         | 3.99                  | 14.08      | 11.31              | 9.78     |
| quartz                                                                                                                                                                                                                                                                                                                                                                                                                                                                                                                                                                                                                                                             | 31.58                         | 20.10       | 19.37           | 8.03          | 2.21                  | 20.19      | 25.46              | 6.93     |
| Total                                                                                                                                                                                                                                                                                                                                                                                                                                                                                                                                                                                                                                                              | 102.42                        | 100.48      | 100.98          | 104.14        | 106.41                | 108.20     | 100.00             | 99.99    |
| The Map Grid Australia (MGA) 1994 UTM coordinates, Zone 51, are equivalent to World Geodetic Survey (WGS) 1984.                                                                                                                                                                                                                                                                                                                                                                                                                                                                                                                                                    |                               |             |                 |               |                       |            |                    |          |
| Phenocryst and alteration minerals are volume percent visual estimates using percentage diagrams.                                                                                                                                                                                                                                                                                                                                                                                                                                                                                                                                                                  |                               |             |                 |               |                       |            |                    |          |
| Minerals: actinolite(act), ankerite (ank), biotite (bt), calcite (cal), ilmenite (ilm), K-feldspar (kfs), magnetite (mag), muscovite-phengite (ms), plagioclase (pl), pyrite (py), quartz (qtz). Carbonate is leached and pyrite oxidized (ox) to limonite in the surface samples. Albite is dominant in all samples.                                                                                                                                                                                                                                                                                                                                              |                               |             |                 |               |                       |            |                    |          |
| Samples 59070 (2.63 g/cc) and 59071 (2.67 g/cc) are from the Clarke Earth Science museum at the University of Western Australia. They were ground in an agate mill, the others in a tungsten carbide ring mill (W, Co contamination). 59070 and 59071 powders were analyzed by wet chemistry (MgO, Na2O), XRF fused glass disc, FeO by titration, and Leco induction furnace (CO2; O'Beirne 1968). P2O5 and sulfur were analyzed separately by ICP-OES at Genalysis/Intertek, Perth.                                                                                                                                                                               |                               |             |                 |               |                       |            |                    |          |
| The powders of the four HB open pit samples were analyzed at the Genalysis/Intertek laboratory in Perth by X-ray fluorescence fused glass disc, and induction furnace infrared spectrometry (CO2). Loss on ignition (LOI) was at 1000°C. Detection limits are 0.01-0.05 wt.% for oxides and 10-20 ppm for sulfur. Fe2O3 not analyzed (n.a.) means that the total iron is reported as FeO.                                                                                                                                                                                                                                                                          |                               |             |                 |               |                       |            |                    |          |
| The Mesonorm works well for unaltered TTGs and adakites but gives only approximate mineralogy for altered rocks. Negative apatite / orthoclase were set to Zero, and Totals >102% indicate suspect minerals. Calcite (for carbonate), pyrite and albite contents are considered reasonably reliable. K-feldspar is more abundant (5-15%) in HB-5 and HB-6 than indicated by microscopy. Biotite is incorrectly calculated: in HB-6 instead of muscovite because the carbonate is dolomite-ankerite and not calcite, in rocks with K2O<0.15% including the weakly weathered surface samples. Al2O3 as corundum suggests muscovite, phengite or kaolinite (surface). |                               |             |                 |               |                       |            |                    |          |

**Table S1b:** Whole rock trace element analyses of porphyry dykes from the Hampton Boulder open pit and outcrops at the New Celebration gold deposit, Kalgoorlie, Western Australia.

|            | Quartz-plagioclase porphyries |             |             |             |             | Albite-act porphyries |         | Method | Detect. limits (ppm) | Background  |          |
|------------|-------------------------------|-------------|-------------|-------------|-------------|-----------------------|---------|--------|----------------------|-------------|----------|
| Sample no. | 59070                         | HB-4        | HB-5        | HB-6        | HB-8a       | 59071                 |         |        |                      | TTG <3 Ga   | Archean  |
| Location   | Surface                       | HB open pit | HB open pit | HB open pit | HB open pit | Surface               |         |        | (ppm)                | Cont. Crust | adakites |
| Ag (ppm)   | 1.2                           | 0.14        | 0.29        | 1.53        | 0.05        | 0.4                   | 4A/MS   | 0.01   |                      | 0.07        |          |
| As         | < 1                           | < 0.5       | < 0.5       | 1.1         | 0.9         | 2                     | 4A/MS   | 0.5    |                      | 1.8         |          |
| Au         | n.a.                          | 0.008       | 0.54        | 11.19       | 0.005       | n.a.                  | FA25/MS | 0.001  |                      | 0.002       |          |
| Ba         | 1610                          | 1390        | 1672        | 525         | 214         | 158                   | FB6/MS  | 0.5    |                      | 847         | 1543     |
| Be         | 1.7                           | 1.64        | 1.37        | 1.45        | 1.14        | 0.8                   | 4A/MS   | 0.05   |                      | 1.0         |          |
| Bi         | 4.0                           | 0.28        | 0.36        | 0.64        | 0.22        | 0.26                  | 4A/MS   | 0.01   |                      | 0.2         |          |
| Cd         | n.a.                          | 0.03        | 0.02        | 0.06        | 0.05        | n.a.                  | 4A/MS   | 0.02   |                      | 0.2         |          |
| Co         | < 5                           | n.a.        | n.a.        | n.a.        | n.a.        | 7                     | 4A/MS   | 0.1    |                      | 9           |          |
| Cr         | 11                            | < 20        | 22          | 141         | 130         | 131                   | FB6/OE  | 20     |                      | 50          | 128      |
| Cs         | 0.07                          | 0.52        | 0.64        | 0.46        | 0.30        | 0.55                  | FB6/MS  | 0.05   |                      | 0.7         |          |
| Cu         | 44                            | < 0.5       | 12          | 8.2         | 35          | 30                    | 4A/OE   | 0.5    |                      | 9           |          |
| Ga         | 21                            | 19.8        | 19.2        | 20.0        | 18.6        | 21                    | FB6/MS  | 0.1    |                      | 18          |          |
| Ge         | n.a.                          | 0.78        | 0.89        | 0.68        | 0.91        | n.a.                  | 4A/MS   | 0.05   |                      | 1.5         |          |
| Hf         | 2.8                           | 3.2         | 3.0         | 3.2         | 3.7         | 3.3                   | FB6/MS  | 0.1    |                      | 3.0         |          |
| Hg         | n.a.                          | < 0.001     | 0.002       | 0.005       | 0.001       | n.a.                  | HG1/CV  | 0.001  |                      | 0.08        |          |
| In         | n.a.                          | 0.009       | 0.014       | 0.025       | 0.018       | n.a.                  | 4A/MS   | 0.005  |                      | 0.1         |          |
| Li         | 0.9                           | 3.8         | 5.7         | 3.9         | 2.9         | 1.2                   | 4A/MS   | 0.1    |                      | 21          |          |
| Mo         | 0.8                           | 0.5         | 3.0         | 1.5         | 13.5        | 0.7                   | 4A/MS   | 0.1    |                      | 1.5         |          |
| Nb         | 1.8                           | 1.7         | 1.6         | 2.0         | 3.0         | 2.3                   | FB6/MS  | 0.1    |                      | 7           | 10       |
| Ni         | 2                             | 7.5         | 9.8         | 73          | 63          | 52                    | 4A/OE   | 0.5    |                      | 21          | 72       |
| Pb         | 275                           | 32          | 30          | 34          | 9.4         | 7                     | 4A/MS   | 0.5    |                      | 13          |          |
| Pd         | n.a.                          | < 0.001     | < 0.001     | 0.003       | 0.006       | n.a.                  | FA25/MS | 0.001  |                      | 0.002       |          |
| Pt         | n.a.                          | < 0.001     | < 0.001     | 0.004       | 0.007       | n.a.                  | FA25/MS | 0.001  |                      | 0.002       |          |
| Rb         | < 2                           | 10          | 43          | 31          | 1.3         | < 2                   | FB6/MS  | 0.1    |                      | 67          | 65       |
| Re         | < 0.01                        | 0.003       | 0.004       | 0.002       | 0.004       | < 0.01                | 4A/MS   | 0.002  |                      | 0.001       |          |
| Sb         | 0.17                          | 0.13        | 0.20        | 0.51        | 0.09        | 0.22                  | 4A/MS   | 0.05   |                      | 0.2         |          |
| Sc         | < 3                           | < 10        | < 10        | < 10        | < 10        | 3                     | FB6/OE  | 10     |                      | 3           |          |
| Se         | n.a.                          | < 0.5       | 0.5         | 1.1         | 0.7         | n.a.                  | 4A/MS   | 0.5    |                      | 0.05        |          |
| Sn         | 0.7                           | < 1         | < 1         | 1           | 1           | 1.0                   | FB6/MS  | 1      |                      | 2           |          |
| Sr         | 646                           | 844         | 1002        | 643         | 602         | 460                   | FB6/MS  | 0.2    |                      | 541         | 1170     |
| Ta         | 0.36                          | 0.3         | 0.4         | 0.2         | 0.3         | 0.33                  | FB6/MS  | 0.1    |                      | 0.1         |          |
| Te         | 0.7                           | < 0.05      | 0.11        | 1.57        | 0.06        | 0.3                   | 4A/MS   | 0.05   |                      | 0.001       |          |
| Th         | 8.7                           | 9.89        | 9.13        | 6.02        | 5.28        | 5.2                   | FB6/MS  | 0.05   |                      | 7.2         |          |
| Tl         | 0.05                          | 0.08        | 0.43        | 0.28        | < 0.02      | 0.03                  | 4A/MS   | 0.02   |                      | 0.5         |          |
| U          | 2.1                           | 3.2         | 2.8         | 4.9         | 1.4         | 0.91                  | FB6/MS  | 0.05   |                      | 1.8         |          |
| V          | 20                            | 18          | 16          | 39          | 74          | 63                    | FB6/OE  | 10     |                      | 52          | 95       |
| W          | 1.6                           | n.a.        | n.a.        | n.a.        | n.a.        | 1.9                   | FB6/MS  | 1      |                      | 1.5         |          |
| Y          | 2.4                           | 2.6         | 2.6         | 4.3         | 8.4         | 8                     | FB6/MS  | 0.5    |                      | 11          | 18       |
| Zn         | 28                            | 39          | 24          | 56          | 30          | 25                    | 4A/OE   | 1      |                      | 51          |          |
| Zr         | 116                           | 100         | 100         | 103         | 127         | 145                   | FB6/MS  | 1      |                      | 95          | 184      |
| La         | 22                            | 19.0        | 19.8        | 23.2        | 23.9        | 32                    | FB6/MS  | 0.2    |                      | 30.8        | 59.9     |
| Ce         | 42                            | 36.8        | 37.5        | 51.5        | 58.6        | 57                    | FB6/MS  | 0.5    |                      | 58.5        | 125      |
| Pr         | 4.5                           | 4.13        | 4.08        | 5.32        | 6.38        | 7.8                   | FB6/MS  | 0.05   |                      | n.a.        | n.a.     |
| Nd         | 16                            | 14.3        | 14.5        | 19.7        | 25.4        | 30                    | FB6/MS  | 0.1    |                      | 23.2        | 54.8     |
| Sm         | 3.0                           | 2.42        | 2.43        | 3.22        | 4.42        | 4.6                   | FB6/MS  | 0.05   |                      | 3.5         | 9.8      |
| Eu         | 0.85                          | 0.62        | 0.52        | 0.79        | 1.15        | 1.2                   | FB6/MS  | 0.05   |                      | 0.9         | 2.3      |
| Gd         | 1.6                           | 1.46        | 1.44        | 2.03        | 3.04        | 3.3                   | FB6/MS  | 0.05   |                      | 2.3         | 6.0      |
| Tb         | 0.17                          | 0.14        | 0.16        | 0.19        | 0.36        | 0.39                  | FB6/MS  | 0.02   |                      | n.a.        | n.a.     |
| Dy         | 0.73                          | 0.68        | 0.60        | 0.92        | 1.67        | 1.9                   | FB6/MS  | 0.05   |                      | 1.6         | 3.2      |
| Ho         | n.a.                          | 0.08        | 0.08        | 0.14        | 0.28        | n.a.                  | FB6/MS  | 0.02   |                      | n.a.        | n.a.     |
| Er         | 0.19                          | 0.22        | 0.21        | 0.39        | 0.75        | 0.78                  | FB6/MS  | 0.05   |                      | 0.75        | 1.41     |
| Yb         | 0.17                          | 0.15        | 0.16        | 0.34        | 0.64        | 0.60                  | FB6/MS  | 0.05   |                      | 0.63        | 1.32     |
| Lu         | 0.03                          | 0.02        | 0.02        | 0.05        | 0.08        | 0.10                  | FB6/MS  | 0.02   |                      | 0.12        | 0.26     |
| (La/Yb) N  | 84.69                         | 84.70       | 82.75       | 45.63       | 24.97       | 35.11                 |         |        |                      | 32.52       | 29.92    |

Samples 59070 and 59071, analyses by XRF: Ba, Co, Cr, Sc (DL 3-5 ppm), Cu, Ga, Ni, Pb, Rb, Sr, V, Y, Zn, Zr (DL 1-2 ppm) at the University of Western Australia (unpubl. Mueller 1990). All other analyses at Genalysis/Intertek laboratories, Perth, using the methods listed. 4A/MS or OE= 4-acid digest (hydrofluoric, nitric, perchloric, hydrochloric), ICP-MS or -OES. FA25/MS = 25 g lead collection fire assay in new pots, ICP-MS analysis. FB6/MS or OE= lithium borate fusion, analysis by ICP-MS or -OES. HG1/CV = low-T perchloric acid digest, analysed by cold vapour generation AAS. Re and Te crustal values: Wikipedia. Neoproterozoic trondhjemite-tonalite-granodiorite (TTG) batholiths: Martin et al. 2005 and Feng et al. 1993 (black). Neoproterozoic adakites (sanukitoids): Martin et al. 2005. Bulk continental crust: Krauskopf & Bird 1995 (red).

|                                                                                                                                                                                                                                                                                                                                                                                                                                                                   |                                                                                                                                                                                        |              |               |               |               |              |                                                     |               |               |               |               |               |
|-------------------------------------------------------------------------------------------------------------------------------------------------------------------------------------------------------------------------------------------------------------------------------------------------------------------------------------------------------------------------------------------------------------------------------------------------------------------|----------------------------------------------------------------------------------------------------------------------------------------------------------------------------------------|--------------|---------------|---------------|---------------|--------------|-----------------------------------------------------|---------------|---------------|---------------|---------------|---------------|
| <b>Table S2:</b>                                                                                                                                                                                                                                                                                                                                                                                                                                                  | Energy-dispersive (EDS) electron microprobe analyses of actinolite and albite in dykes from the Hampton Boulder open pit, New Celebration gold deposit, Kalgoorlie, Western Australia. |              |               |               |               |              |                                                     |               |               |               |               |               |
|                                                                                                                                                                                                                                                                                                                                                                                                                                                                   | <b>Albite-actinolite Porphyry (sample HB-8a)</b>                                                                                                                                       |              |               |               |               |              | <b>Quartz-actinolite veined dyke (sample HB-8b)</b> |               |               |               |               |               |
| Contact pair                                                                                                                                                                                                                                                                                                                                                                                                                                                      | Pair 1                                                                                                                                                                                 | Pair 1       | Pair 2        | Pair 2        | Pair 3        | Pair 3       | Pair 1                                              | Pair 1        | Pair 2        | Pair 2        | Pair 3        | Pair 3        |
| Mineral                                                                                                                                                                                                                                                                                                                                                                                                                                                           | Actinolite                                                                                                                                                                             | Albite       | Actinolite    | Albite        | Actinolite    | Albite       | Actinolite                                          | Albite        | Actinolite    | Albite        | Actinolite    | Albite        |
| Analyses                                                                                                                                                                                                                                                                                                                                                                                                                                                          | n=2                                                                                                                                                                                    | n=3          | n=3           | n=3           | n=2           | n=3          | n=3                                                 | n=3           | n=3           | n=3           | n=3           | n=3           |
| SiO <sub>2</sub> (wt.%)                                                                                                                                                                                                                                                                                                                                                                                                                                           | 53.01                                                                                                                                                                                  | 68.46        | 56.09         | 69.22         | 55.49         | 68.29        | 56.00                                               | 69.36         | 55.95         | 69.05         | 56.89         | 69.34         |
| TiO <sub>2</sub>                                                                                                                                                                                                                                                                                                                                                                                                                                                  | 0.11                                                                                                                                                                                   | 0.00         | 0.00          | 0.00          | 0.20          | 0.00         | 0.10                                                | 0.00          | 0.00          | 0.00          | 0.00          | 0.00          |
| Al <sub>2</sub> O <sub>3</sub>                                                                                                                                                                                                                                                                                                                                                                                                                                    | 2.53                                                                                                                                                                                   | 18.89        | 0.59          | 19.19         | 1.65          | 18.90        | 2.09                                                | 19.10         | 1.85          | 19.11         | 1.12          | 19.15         |
| Cr <sub>2</sub> O <sub>3</sub>                                                                                                                                                                                                                                                                                                                                                                                                                                    | 0.14                                                                                                                                                                                   | 0.00         | 0.00          | 0.00          | 0.00          | 0.00         | 0.11                                                | 0.00          | 0.25          | 0.00          | 0.00          | 0.00          |
| Fe <sub>2</sub> O <sub>3</sub>                                                                                                                                                                                                                                                                                                                                                                                                                                    | 2.17                                                                                                                                                                                   | 0.16         | 0.78          | 0.20          | 0.60          | 0.28         | 1.21                                                | 0.00          | 1.10          | 0.18          | 0.60          | 0.00          |
| FeO                                                                                                                                                                                                                                                                                                                                                                                                                                                               | 8.92                                                                                                                                                                                   | 0.00         | 9.23          | 0.00          | 9.23          | 0.00         | 6.22                                                | 0.00          | 6.32          | 0.00          | 6.92          | 0.00          |
| MnO                                                                                                                                                                                                                                                                                                                                                                                                                                                               | 0.15                                                                                                                                                                                   | 0.00         | 0.15          | 0.00          | 0.15          | 0.00         | 0.00                                                | 0.00          | 0.00          | 0.00          | 0.15          | 0.00          |
| MgO                                                                                                                                                                                                                                                                                                                                                                                                                                                               | 16.80                                                                                                                                                                                  | 0.00         | 18.16         | 0.00          | 17.62         | 0.00         | 19.48                                               | 0.00          | 19.32         | 0.00          | 19.54         | 0.00          |
| CaO                                                                                                                                                                                                                                                                                                                                                                                                                                                               | 11.50                                                                                                                                                                                  | 0.20         | 11.46         | 0.16          | 12.34         | 0.12         | 12.27                                               | 0.10          | 12.21         | 0.20          | 12.40         | 0.11          |
| Na <sub>2</sub> O                                                                                                                                                                                                                                                                                                                                                                                                                                                 | 1.00                                                                                                                                                                                   | 11.50        | 0.63          | 11.68         | 0.61          | 11.57        | 0.74                                                | 11.79         | 0.69          | 11.67         | 0.47          | 11.82         |
| K <sub>2</sub> O                                                                                                                                                                                                                                                                                                                                                                                                                                                  | 0.00                                                                                                                                                                                   | 0.00         | 0.00          | 0.00          | 0.00          | 0.00         | 0.00                                                | 0.00          | 0.00          | 0.00          | 0.00          | 0.00          |
| <b>Total</b>                                                                                                                                                                                                                                                                                                                                                                                                                                                      | <b>96.33</b>                                                                                                                                                                           | <b>99.21</b> | <b>97.09</b>  | <b>100.45</b> | <b>97.89</b>  | <b>99.16</b> | <b>98.22</b>                                        | <b>100.35</b> | <b>97.69</b>  | <b>100.21</b> | <b>98.09</b>  | <b>100.42</b> |
| Si                                                                                                                                                                                                                                                                                                                                                                                                                                                                | 7.659                                                                                                                                                                                  | 3.011        | 7.968         | 3.008         | 7.840         | 3.007        | 7.786                                               | 3.015         | 7.821         | 3.008         | 7.920         | 3.013         |
| Ti                                                                                                                                                                                                                                                                                                                                                                                                                                                                | 0.012                                                                                                                                                                                  | 0.000        | 0.000         | 0.000         | 0.021         | 0.000        | 0.010                                               | 0.000         | 0.000         | 0.000         | 0.000         | 0.000         |
| Al                                                                                                                                                                                                                                                                                                                                                                                                                                                                | 0.431                                                                                                                                                                                  | 0.980        | 0.099         | 0.983         | 0.275         | 0.981        | 0.343                                               | 0.979         | 0.305         | 0.982         | 0.184         | 0.981         |
| Cr                                                                                                                                                                                                                                                                                                                                                                                                                                                                | 0.016                                                                                                                                                                                  | 0.000        | 0.000         | 0.000         | 0.000         | 0.000        | 0.012                                               | 0.000         | 0.028         | 0.000         | 0.000         | 0.000         |
| Fe <sub>3</sub>                                                                                                                                                                                                                                                                                                                                                                                                                                                   | 0.236                                                                                                                                                                                  | 0.005        | 0.084         | 0.007         | 0.064         | 0.009        | 0.126                                               | 0.000         | 0.115         | 0.006         | 0.063         | 0.000         |
| Fe <sub>2</sub>                                                                                                                                                                                                                                                                                                                                                                                                                                                   | 1.078                                                                                                                                                                                  | 0.000        | 1.096         | 0.000         | 1.091         | 0.000        | 0.723                                               | 0.000         | 0.739         | 0.000         | 0.806         | 0.000         |
| Mn                                                                                                                                                                                                                                                                                                                                                                                                                                                                | 0.018                                                                                                                                                                                  | 0.000        | 0.018         | 0.000         | 0.018         | 0.000        | 0.000                                               | 0.000         | 0.000         | 0.000         | 0.018         | 0.000         |
| Mg                                                                                                                                                                                                                                                                                                                                                                                                                                                                | 3.617                                                                                                                                                                                  | 0.000        | 3.845         | 0.000         | 3.710         | 0.000        | 4.036                                               | 0.000         | 4.025         | 0.000         | 4.054         | 0.000         |
| Ca                                                                                                                                                                                                                                                                                                                                                                                                                                                                | 1.780                                                                                                                                                                                  | 0.009        | 1.744         | 0.007         | 1.868         | 0.006        | 1.828                                               | 0.005         | 1.829         | 0.009         | 1.850         | 0.005         |
| Na                                                                                                                                                                                                                                                                                                                                                                                                                                                                | 0.280                                                                                                                                                                                  | 0.981        | 0.174         | 0.984         | 0.167         | 0.988        | 0.199                                               | 0.994         | 0.187         | 0.986         | 0.127         | 0.996         |
| K                                                                                                                                                                                                                                                                                                                                                                                                                                                                 | 0.000                                                                                                                                                                                  | 0.000        | 0.000         | 0.000         | 0.000         | 0.000        | 0.000                                               | 0.000         | 0.000         | 0.000         | 0.000         | 0.000         |
| <b>Cation sum</b>                                                                                                                                                                                                                                                                                                                                                                                                                                                 | <b>15.127</b>                                                                                                                                                                          | <b>4.986</b> | <b>15.028</b> | <b>4.989</b>  | <b>15.054</b> | <b>4.991</b> | <b>15.063</b>                                       | <b>4.993</b>  | <b>15.049</b> | <b>4.991</b>  | <b>15.022</b> | <b>4.995</b>  |
| Oxygens                                                                                                                                                                                                                                                                                                                                                                                                                                                           | 23                                                                                                                                                                                     | 8            | 23            | 8             | 23            | 8            | 23                                                  | 8             | 23            | 8             | 23            | 8             |
| <b>Classification according to the International Mineralogical Association (Leake et al. 1997)</b>                                                                                                                                                                                                                                                                                                                                                                |                                                                                                                                                                                        |              |               |               |               |              |                                                     |               |               |               |               |               |
| Mg/Mg+Fe <sub>2</sub>                                                                                                                                                                                                                                                                                                                                                                                                                                             | 0.77                                                                                                                                                                                   |              | 0.78          |               | 0.77          |              | 0.85                                                |               | 0.84          |               | 0.83          |               |
| (Na + K) A                                                                                                                                                                                                                                                                                                                                                                                                                                                        | 0.060                                                                                                                                                                                  |              | 0.000         |               | 0.035         |              | 0.027                                               |               | 0.016         |               | 0.000         |               |
| Name                                                                                                                                                                                                                                                                                                                                                                                                                                                              | actinolite                                                                                                                                                                             |              | actinolite    |               | actinolite    |              | actinolite                                          |               | actinolite    |               | actinolite    |               |
| <b>Edenite-tremolite thermometer at Xab = 0.98 (Holland and Blundy 1994)</b>                                                                                                                                                                                                                                                                                                                                                                                      |                                                                                                                                                                                        |              |               |               |               |              |                                                     |               |               |               |               |               |
| T °C at 4 kb                                                                                                                                                                                                                                                                                                                                                                                                                                                      | 550                                                                                                                                                                                    |              | no result     |               | no result     |              | 480                                                 |               | no result     |               | no result     |               |
| <b>Temperature estimates after Spear (1980)</b>                                                                                                                                                                                                                                                                                                                                                                                                                   |                                                                                                                                                                                        |              |               |               |               |              |                                                     |               |               |               |               |               |
| ln(Xan/Xab)                                                                                                                                                                                                                                                                                                                                                                                                                                                       |                                                                                                                                                                                        | -4.69        |               | -4.95         |               | -5.10        |                                                     | -5.29         |               | -4.70         |               | -5.29         |
| ln(Ca/Na)M4                                                                                                                                                                                                                                                                                                                                                                                                                                                       | 2.09                                                                                                                                                                                   |              | 2.30          |               | 2.65          |              | 2.36                                                |               | 2.37          |               | 2.68          |               |
| The EDS system count rate was calibrated using pure copper, and standard spectra were collected in the TESCAN Vega3 SEM from jadeite (Na), periclase (Mg), corundum (Al), wollastonite (Si and Ca), orthoclase (K), rutile (Ti), chromite (Cr), rhodonite (Mn) and pyrite (Fe). Analytical precision is ±1-2% relative for major elements (>10 wt.%) and ±5-10% relative for minor elements (<10 wt.%). Zero oxide values are below the 0.1 wt.% detection limit. |                                                                                                                                                                                        |              |               |               |               |              |                                                     |               |               |               |               |               |
| The program AX of Holland and Powell (2000) was used for Fe <sub>3</sub> /Fe <sub>2</sub> allocation, see Holland and Blundy (1994; App. B).                                                                                                                                                                                                                                                                                                                      |                                                                                                                                                                                        |              |               |               |               |              |                                                     |               |               |               |               |               |

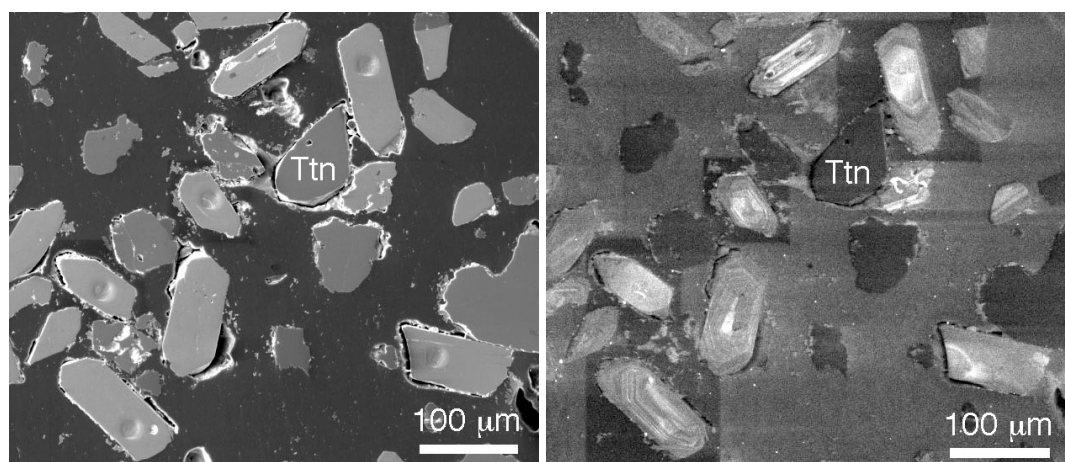

**Figure S1:** Scanning electron microscope images of igneous zircons and alteration titanite (Ttn) in SHRIMP mount 12-21C, sample HB-8a: Backscattered electron image (left) showing the analytical pits sputtered by the ion microprobe beam in five zircon grains. Cathodo-luminescence image (right) showing the oscillatory zones in the zircons analyzed.



| Table S3:                                                                                                                       | Ion microprobe U-Pb analyses of zircons from the Albite-actinolite Porphyry dyke (sample HB-8a), Hampton-Boulder open pit, New Celebration gold deposit, Kalgoorlie, Western Australia. |          |      |                   |                |        |              |        |              |        |                   |                      |    |                       |    |          |
|---------------------------------------------------------------------------------------------------------------------------------|-----------------------------------------------------------------------------------------------------------------------------------------------------------------------------------------|----------|------|-------------------|----------------|--------|--------------|--------|--------------|--------|-------------------|----------------------|----|-----------------------|----|----------|
| Grain-spot (session)                                                                                                            | U (ppm)                                                                                                                                                                                 | Th (ppm) | Th/U | commo n 206Pb (%) | 207Pb* /206Pb* | 1σ (%) | 207Pb* /235U | 1σ (%) | 206Pb* /238U | 1σ (%) | error corre latio | 206Pb /238U Age (Ma) | 1σ | 207Pb /206Pb Age (Ma) | 1σ | Disc (%) |
| Zircon xenocryst (Grain 23)                                                                                                     |                                                                                                                                                                                         |          |      |                   |                |        |              |        |              |        |                   |                      |    |                       |    |          |
| 23-2(2)                                                                                                                         | 57                                                                                                                                                                                      | 51       | 0.92 | 0.06              | 0.1979         | 1.11   | 14.6         | 2.4    | 0.534        | 2.1    | 0.88              | 2757                 | 47 | 2809                  | 18 | 2        |
| 23-1(1)                                                                                                                         | 59                                                                                                                                                                                      | 64       | 1.13 | 0.09              | 0.1967         | 0.64   | 14.16        | 2.1    | 0.522        | 2.0    | 0.95              | 2709                 | 44 | 2799                  | 10 | 3        |
| 23-3(2)                                                                                                                         | 74                                                                                                                                                                                      | 74       | 1.03 | 0.27              | 0.1931         | 1.10   | 14.1         | 2.2    | 0.530        | 1.9    | 0.87              | 2740                 | 43 | 2769                  | 18 | 1        |
| 23-5(2)                                                                                                                         | 59                                                                                                                                                                                      | 50       | 0.87 | 0.25              | 0.1929         | 1.17   | 13.9         | 2.4    | 0.522        | 2.1    | 0.87              | 2708                 | 45 | 2767                  | 19 | 2        |
| 23-4(2)                                                                                                                         | 74                                                                                                                                                                                      | 176      | 2.45 | 0.12              | 0.1943         | 1.17   | 8.5          | 2.2    | 0.318        | 1.8    | 0.84              | 1780                 | 28 | 2779                  | 19 | 36       |
| Main population of igneous zircons (≤ 5% discordant): Weighted mean age 2662 ± 4 Ma, n = 16, MSWD = 1.14                        |                                                                                                                                                                                         |          |      |                   |                |        |              |        |              |        |                   |                      |    |                       |    |          |
| 3-1(1)                                                                                                                          | 78                                                                                                                                                                                      | 0        | 0.00 | 0.09              | 0.1821         | 0.60   | 12.62        | 1.5    | 0.502        | 1.4    | 0.92              | 2624                 | 31 | 2672                  | 10 | 2        |
| 2-1(1)                                                                                                                          | 202                                                                                                                                                                                     | 82       | 0.42 | 0.02              | 0.1820         | 0.39   | 12.35        | 1.6    | 0.492        | 1.5    | 0.97              | 2580                 | 32 | 2672                  | 6  | 3        |
| 10-1(1)                                                                                                                         | 180                                                                                                                                                                                     | 127      | 0.73 | 0.07              | 0.1818         | 0.39   | 12.45        | 1.7    | 0.497        | 1.7    | 0.97              | 2599                 | 36 | 2670                  | 6  | 3        |
| 42-1(2)                                                                                                                         | 344                                                                                                                                                                                     | 305      | 0.92 | 0.03              | 0.1818         | 0.44   | 12.0         | 1.3    | 0.481        | 1.2    | 0.94              | 2531                 | 26 | 2669                  | 7  | 5        |
| 4-2(2)                                                                                                                          | 499                                                                                                                                                                                     | 255      | 0.53 | 0.04              | 0.1816         | 0.36   | 12.5         | 1.2    | 0.498        | 1.2    | 0.96              | 2605                 | 25 | 2668                  | 6  | 2        |
| 6-1(1)                                                                                                                          | 123                                                                                                                                                                                     | 98       | 0.83 | 0.09              | 0.1815         | 0.49   | 12.31        | 1.9    | 0.492        | 1.9    | 0.97              | 2579                 | 40 | 2667                  | 8  | 3        |
| 15-1(1)                                                                                                                         | 96                                                                                                                                                                                      | 70       | 0.76 | 0.09              | 0.1814         | 0.55   | 12.43        | 2.1    | 0.497        | 2.0    | 0.97              | 2600                 | 44 | 2666                  | 9  | 2        |
| 5-1(1)                                                                                                                          | 147                                                                                                                                                                                     | 107      | 0.75 | 0.05              | 0.1812         | 0.45   | 12.10        | 2.9    | 0.485        | 2.9    | 0.99              | 2547                 | 61 | 2664                  | 7  | 4        |
| 4-1(1)                                                                                                                          | 64                                                                                                                                                                                      | 35       | 0.57 | 0.09              | 0.1806         | 0.69   | 12.47        | 1.7    | 0.501        | 1.5    | 0.91              | 2616                 | 33 | 2659                  | 11 | 2        |
| 14-1(1)                                                                                                                         | 152                                                                                                                                                                                     | 125      | 0.85 | 0.26              | 0.1806         | 0.48   | 11.96        | 2.3    | 0.480        | 2.2    | 0.98              | 2529                 | 47 | 2658                  | 8  | 5        |
| 24-1(1)                                                                                                                         | 149                                                                                                                                                                                     | 117      | 0.81 | 0.07              | 0.1804         | 0.76   | 12.07        | 1.5    | 0.485        | 1.3    | 0.86              | 2550                 | 27 | 2657                  | 13 | 4        |
| 44-1(2)                                                                                                                         | 161                                                                                                                                                                                     | 138      | 0.89 | 0.21              | 0.1803         | 0.75   | 12.2         | 1.7    | 0.492        | 1.5    | 0.89              | 2578                 | 31 | 2655                  | 12 | 3        |
| 27-1(2)                                                                                                                         | 631                                                                                                                                                                                     | 283      | 0.46 | 0.03              | 0.1800         | 0.31   | 12.2         | 1.4    | 0.493        | 1.4    | 0.98              | 2585                 | 29 | 2653                  | 5  | 3        |
| 28-1(2)                                                                                                                         | 218                                                                                                                                                                                     | 171      | 0.81 | 0.05              | 0.1800         | 0.56   | 12.1         | 1.4    | 0.489        | 1.3    | 0.92              | 2568                 | 28 | 2653                  | 9  | 3        |
| 22-1(1)                                                                                                                         | 178                                                                                                                                                                                     | 170      | 0.99 | 0.22              | 0.1800         | 0.39   | 12.26        | 1.5    | 0.494        | 1.5    | 0.97              | 2589                 | 31 | 2653                  | 7  | 2        |
| 7-1(1)                                                                                                                          | 191                                                                                                                                                                                     | 168      | 0.90 | 0.15              | 0.1797         | 0.39   | 12.16        | 1.3    | 0.491        | 1.3    | 0.95              | 2574                 | 27 | 2650                  | 7  | 3        |
| Statistical outlier, omitted from the weighted mean age                                                                         |                                                                                                                                                                                         |          |      |                   |                |        |              |        |              |        |                   |                      |    |                       |    |          |
| 6-2(2)                                                                                                                          | 714                                                                                                                                                                                     | 375      | 0.54 | 0.05              | 0.1747         | 0.29   | 12.1         | 1.1    | 0.502        | 1.1    | 0.97              | 2623                 | 24 | 2603                  | 5  | -1       |
| Discordant analyses (>5%)                                                                                                       |                                                                                                                                                                                         |          |      |                   |                |        |              |        |              |        |                   |                      |    |                       |    |          |
| 30-1(2)                                                                                                                         | 460                                                                                                                                                                                     | 731      | 1.64 | 0.13              | 0.1834         | 0.41   | 11.1         | 1.2    | 0.438        | 1.2    | 0.94              | 2343                 | 23 | 2683                  | 7  | 13       |
| 34-1(2)                                                                                                                         | 168                                                                                                                                                                                     | 140      | 0.86 | 0.09              | 0.1827         | 0.74   | 11.9         | 1.6    | 0.474        | 1.5    | 0.89              | 2501                 | 30 | 2678                  | 12 | 7        |
| 8-1(1)                                                                                                                          | 242                                                                                                                                                                                     | 240      | 1.03 | 0.15              | 0.1821         | 0.36   | 11.21        | 1.3    | 0.446        | 1.2    | 0.96              | 2379                 | 25 | 2672                  | 6  | 11       |
| 32-1(2)                                                                                                                         | 105                                                                                                                                                                                     | 84       | 0.83 | 0.00              | 0.1819         | 0.86   | 11.6         | 1.9    | 0.463        | 1.6    | 0.89              | 2452                 | 34 | 2670                  | 14 | 8        |
| 13-1(1)                                                                                                                         | 297                                                                                                                                                                                     | 322      | 1.12 | 0.07              | 0.1816         | 0.33   | 11.39        | 2.6    | 0.455        | 2.5    | 0.99              | 2417                 | 51 | 2668                  | 5  | 9        |
| 31-1(2)                                                                                                                         | 152                                                                                                                                                                                     | 78       | 0.53 | 0.12              | 0.1814         | 0.79   | 10.1         | 2.2    | 0.404        | 2.0    | 0.93              | 2187                 | 38 | 2666                  | 13 | 18       |
| 39-1(2)                                                                                                                         | 110                                                                                                                                                                                     | 117      | 1.09 | 0.00              | 0.1814         | 0.85   | 10.1         | 1.8    | 0.404        | 1.6    | 0.88              | 2190                 | 29 | 2666                  | 14 | 18       |
| 42-3(2)                                                                                                                         | 464                                                                                                                                                                                     | 239      | 0.53 | 0.15              | 0.1810         | 0.49   | 10.2         | 3.5    | 0.410        | 3.5    | 0.99              | 2213                 | 66 | 2662                  | 8  | 17       |
| 19-1(1)                                                                                                                         | 207                                                                                                                                                                                     | 399      | 1.99 | 0.04              | 0.1810         | 0.33   | 11.30        | 1.9    | 0.453        | 1.9    | 0.99              | 2408                 | 38 | 2662                  | 5  | 10       |
| 11-1(1)                                                                                                                         | 175                                                                                                                                                                                     | 104      | 0.62 | 0.04              | 0.1809         | 0.40   | 11.25        | 1.6    | 0.451        | 1.6    | 0.97              | 2399                 | 32 | 2661                  | 7  | 10       |
| 1-1(1)                                                                                                                          | 272                                                                                                                                                                                     | 209      | 0.79 | 0.02              | 0.1808         | 1.32   | 11.52        | 2.3    | 0.462        | 1.9    | 0.82              | 2448                 | 39 | 2660                  | 22 | 8        |
| 17-1(1)                                                                                                                         | 132                                                                                                                                                                                     | 90       | 0.71 | 0.04              | 0.1804         | 0.46   | 10.88        | 2.0    | 0.437        | 2.0    | 0.97              | 2338                 | 39 | 2657                  | 8  | 12       |
| 38-1(2)                                                                                                                         | 200                                                                                                                                                                                     | 146      | 0.76 | 0.05              | 0.1803         | 0.63   | 10.1         | 3.3    | 0.407        | 3.2    | 0.98              | 2202                 | 60 | 2656                  | 10 | 17       |
| 12-1(1)                                                                                                                         | 148                                                                                                                                                                                     | 95       | 0.67 | 0.06              | 0.1800         | 0.44   | 11.61        | 1.6    | 0.468        | 1.5    | 0.96              | 2473                 | 31 | 2653                  | 7  | 7        |
| 21-1(1)                                                                                                                         | 130                                                                                                                                                                                     | 90       | 0.72 | 0.17              | 0.1800         | 0.49   | 10.38        | 1.4    | 0.418        | 1.3    | 0.94              | 2252                 | 25 | 2652                  | 8  | 15       |
| 42-2(2)                                                                                                                         | 169                                                                                                                                                                                     | 147      | 0.90 | 0.19              | 0.1799         | 0.74   | 10.5         | 1.6    | 0.423        | 1.4    | 0.88              | 2275                 | 27 | 2652                  | 12 | 14       |
| 9-1(1)                                                                                                                          | 192                                                                                                                                                                                     | 163      | 0.88 | 0.10              | 0.1793         | 0.40   | 11.30        | 1.9    | 0.457        | 1.8    | 0.98              | 2426                 | 37 | 2646                  | 7  | 8        |
| 43-1(2)                                                                                                                         | 221                                                                                                                                                                                     | 200      | 0.93 | 0.16              | 0.1791         | 0.69   | 8.6          | 3.4    | 0.348        | 3.4    | 0.98              | 1927                 | 56 | 2644                  | 11 | 27       |
| 3-2(1)                                                                                                                          | 557                                                                                                                                                                                     | 494      | 0.92 | 0.11              | 0.1784         | 0.38   | 11.0         | 1.2    | 0.447        | 1.1    | 0.95              | 2380                 | 23 | 2638                  | 6  | 10       |
| 16-1(1)                                                                                                                         | 172                                                                                                                                                                                     | 424      | 2.55 | 0.22              | 0.1783         | 0.52   | 7.38         | 2.3    | 0.300        | 2.2    | 0.97              | 1692                 | 33 | 2637                  | 9  | 36       |
| 37-1(2)                                                                                                                         | 115                                                                                                                                                                                     | 74       | 0.66 | 0.26              | 0.1781         | 0.96   | 10.0         | 1.8    | 0.406        | 1.6    | 0.85              | 2196                 | 29 | 2635                  | 16 | 17       |
| 33-1(2)                                                                                                                         | 395                                                                                                                                                                                     | 301      | 0.79 | 0.63              | 0.1779         | 0.73   | 10.1         | 1.8    | 0.412        | 1.7    | 0.92              | 2225                 | 31 | 2633                  | 12 | 15       |
| 27-2(2)                                                                                                                         | 164                                                                                                                                                                                     | 105      | 0.66 | 0.26              | 0.1776         | 0.76   | 9.6          | 1.6    | 0.393        | 1.4    | 0.88              | 2135                 | 26 | 2631                  | 13 | 19       |
| 40-1(2)                                                                                                                         | 255                                                                                                                                                                                     | 166      | 0.67 | 0.54              | 0.1776         | 0.82   | 6.6          | 3.0    | 0.269        | 2.9    | 0.96              | 1536                 | 40 | 2630                  | 14 | 42       |
| 36-1(2)                                                                                                                         | 101                                                                                                                                                                                     | 66       | 0.67 | 0.37              | 0.1770         | 1.03   | 10.9         | 1.9    | 0.448        | 1.6    | 0.85              | 2387                 | 33 | 2625                  | 17 | 9        |
| 25-1(2)                                                                                                                         | 530                                                                                                                                                                                     | 246      | 0.48 | 0.04              | 0.1769         | 0.35   | 11.4         | 1.5    | 0.468        | 1.4    | 0.97              | 2475                 | 29 | 2624                  | 6  | 6        |
| 35-1(2)                                                                                                                         | 180                                                                                                                                                                                     | 83       | 0.47 | 0.36              | 0.1767         | 1.19   | 7.1          | 2.0    | 0.291        | 1.5    | 0.79              | 1647                 | 23 | 2622                  | 20 | 37       |
| 16-2(2)                                                                                                                         | 463                                                                                                                                                                                     | 692      | 1.54 | 0.08              | 0.1751         | 0.71   | 9.5          | 2.4    | 0.395        | 2.3    | 0.96              | 2147                 | 43 | 2607                  | 12 | 18       |
| 18-1(1)                                                                                                                         | 568                                                                                                                                                                                     | 377      | 0.69 | 0.14              | 0.1704         | 2.09   | 9.36         | 2.7    | 0.398        | 1.7    | 0.63              | 2162                 | 31 | 2562                  | 35 | 16       |
| 29-1(2)                                                                                                                         | 728                                                                                                                                                                                     | 592      | 0.84 | 0.05              | 0.1696         | 0.32   | 10.0         | 1.2    | 0.428        | 1.1    | 0.96              | 2297                 | 21 | 2554                  | 5  | 10       |
| 20-1(1)                                                                                                                         | 284                                                                                                                                                                                     | 816      | 2.96 | 0.17              | 0.1616         | 0.34   | 8.75         | 1.3    | 0.393        | 1.2    | 0.96              | 2136                 | 22 | 2473                  | 6  | 14       |
| 26-1(2)                                                                                                                         | 666                                                                                                                                                                                     | 770      | 1.19 | 0.20              | 0.1595         | 0.38   | 9.2          | 1.2    | 0.418        | 1.1    | 0.95              | 2252                 | 21 | 2451                  | 6  | 8        |
| 5-2(2)                                                                                                                          | 670                                                                                                                                                                                     | 692      | 1.07 | 0.12              | 0.1532         | 0.37   | 8.6          | 1.9    | 0.406        | 1.8    | 0.98              | 2198                 | 34 | 2382                  | 6  | 8        |
| 41-1(2)                                                                                                                         | 1140                                                                                                                                                                                    | 1487     | 1.35 | 0.20              | 0.1365         | 0.41   | 6.1          | 1.7    | 0.322        | 1.7    | 0.97              | 1801                 | 26 | 2184                  | 7  | 18       |
| SHRIMP II ion microprobe at the John de Laeter Center, Curtin University, Perth. SHRIMP mount 12-21C, grain cluster HB08-8a.    |                                                                                                                                                                                         |          |      |                   |                |        |              |        |              |        |                   |                      |    |                       |    |          |
| Discordance (Disc) is measured as [100 - (206Pb/238U age)/207Pb/206Pb age] x 100]                                               |                                                                                                                                                                                         |          |      |                   |                |        |              |        |              |        |                   |                      |    |                       |    |          |
| Uncertainty (1 sigma) in the U/Pb calibration for the BR-266 zircon standard: session 1 (1.15%, n=14); session 2 (1.00%, n=12). |                                                                                                                                                                                         |          |      |                   |                |        |              |        |              |        |                   |                      |    |                       |    |          |
| Analytical spot size (approximate): session 1 = 25 microns; session 2 = 12 microns.                                             |                                                                                                                                                                                         |          |      |                   |                |        |              |        |              |        |                   |                      |    |                       |    |          |
| * Radiogenic Pb after correction for common Pb using the Broken Hill lead composition.                                          |                                                                                                                                                                                         |          |      |                   |                |        |              |        |              |        |                   |                      |    |                       |    |          |

## References

- Barth TFW (1959) Principles of classification and norm calculations of metamorphic rocks. *Journal of Geology* 67:135-152
- Feng R, Fan J, Kerrich R (1993) Noble metal abundances and characteristics of six granitic magma series, Archean Abitibi Belt, Pontiac Subprovince: Relationships to metallogeny and overprinting of mesothermal gold deposits. *Econ Geol* 88:1376-1401
- Holland TJB, Blundy J (1994) Non-ideal interactions in calcic amphiboles and their bearing on amphibole-plagioclase thermometry. *Contrib Mineral Petrol* 116:433-447
- Holland TJB, Powell R (2000) A program to calculate activities of mineral end members from chemical analyses (usually determined by electron microprobe): [www.esc.cam.ac.uk/astaff/holland/ax.html](http://www.esc.cam.ac.uk/astaff/holland/ax.html)
- Krauskopf KB, Bird DK (1995) *Introduction to Geochemistry*, 3rd edition. McGraw-Hill, Boston, 647 pp
- Leake BE et al. (1997) Nomenclature of amphiboles: Report of the subcommittee on amphiboles of the International Mineralogical Association, Commission on new minerals and mineral names. *Canadian Mineralogist* 35:219-246
- Martin H, Smithies RH, Rapp R, Moyen JF, Champion D (2005) An overview of adakite, tonalite-trondhjemite-granodiorite (TTG), and sanukitoid: relationships and some implications for crustal evolution. *Lithos* 79:1-24
- O'Beirne WR (1968) The acid porphyries and porphyroid rocks of the Kalgoorlie area. Dissertation, the University of Western Australia, Perth, 410 pp
- Spear FS (1980) NaSi = CaAl exchange equilibrium between plagioclase and amphibole. *Contrib Mineral Petrol* 72:33-41
